# Supplementary material for: Correlation between Psychosomatic Assessment, Heart Rate Variability, and Refractory GERD: A Prospective Study in Patients with Acid Reflux Esophagitis
Source: MDPI journal article supplement (doi:10.3390/life13091862), 2023-09-03
Supplement: s1 [file s1]

**Supplementary Table S1.** Heart rate variability (HRV) parameters.

| HRV Parameter (Unit)                               | Description (normal range)                                     | Represents                                                                                                          |
|----------------------------------------------------|----------------------------------------------------------------|---------------------------------------------------------------------------------------------------------------------|
| HR (Heart Rate) (per min)                          | Number of heartbeats per minute (60-100)                       | Higher heart rate may indicate sympathetic dominance, while lower heart rate may indicate parasympathetic dominance |
| SD (Spectral Distribution)                         | Analysis of frequency components in HRV                        | The distribution of power in different frequency bands                                                              |
| RRIV (R-R Interval Variation) (ms)                 | Variation in duration between successive R waves (19–75)       | Higher RRIV reflects greater HRV and better autonomic function                                                      |
| TP (Total Power) (ms <sup>2</sup> )                | Total power in HRV spectrum                                    | Overall variability and autonomic function                                                                          |
| VL (Very Low Frequency) (Hz)                       | Power in the very low-frequency range (0.003–0.04 Hz)          | Sympathetic modulation and slower physiological processes                                                           |
| LF (Low Frequency) (ms <sup>2</sup> )              | Power in the low-frequency range (0.04 to 0.15 Hz) (193–1,009) | A mixture of sympathetic and parasympathetic influences                                                             |
| HF (High Frequency) (ms <sup>2</sup> )             | Power in the high-frequency range (0.15 to 0.4 Hz) (83–3,630)  | Parasympathetic (vagal) modulation of heart rate                                                                    |
| NN (Normal-to-Normal Interval)                     | Interval between consecutive normal heartbeats (785–1,160)     | Calculate various HRV parameters                                                                                    |
| HRV_ANS age (y/o)                                  | HRV parameters adjusted for age-related changes                | Provides age-specific assessment of HRV                                                                             |
| ANS (Autonomic Nervous System) Balance             | Balance between sympathetic and parasympathetic activity       | A more balanced ANS activity is associated with better cardiovascular health                                        |
| SDNN (Standard Deviation of Normal-to-Normal) (ms) | Standard deviation of NN intervals (32–93 ms)                  | Overall HRV and autonomic regulation.                                                                               |
| In (LF/HF) (Low Frequency/High Frequency)          | Ratio of low-frequency power to high-frequency power           | Sympathovagal balance and autonomic modulation                                                                      |

**Abbreviations:** HRV, heart rate variability.

**Supplementary Table S2.** Variations between before and after treatments for symptoms score.

| Variate/Time | W0        | W4        | W8       | W16     | W24     | W48     | p-value |
|--------------|-----------|-----------|----------|---------|---------|---------|---------|
| GERDQ        | 9.0±2.4*  | 7.6±2.0*  | 6.7±1.7* | 7.4±1.4 | 7.2±1.3 | 6.9±1.4 | *<0.001 |
| GERDQLQ      | 25.3±17.2 | 13.8±12.7 | 7.8±11.3 |         |         |         | <0.001  |
| RSI          | 15.1±8.5  | 8.8±6.8   | 5.9±5.6  |         |         |         | <0.001  |
| BAI          | 6.6±6.6   | 4.2±4.9   | 3.2±4.4  |         |         |         | <0.001  |
| BDI          | 7.1±6.7   | 4.7±5.2   | 3.9±5.0  |         |         |         | <0.001  |
| SSD-8        | 10.9±6.8  | 7.0±5.9   | 4.9±5.3  |         |         |         | <0.001  |

**Abbreviations:** GERDQ, GERD-questionnaire; GERDQLQ, GERD-Quality of Life Questionnaire; RSI, reflux symptom index; BAI, Beck anxiety inventory; BDI, Beck depression inventory; SSD-8, 8-item somatic symptom scale.
